# Supplementary material for: The sleep-anxiety-cancer triad in pediatrics: Unraveling a vicious cycle
Source: Research Square preprint supplement (doi:10.21203/rs.3.rs-7420057/v1), 2025-09-09
Supplement: Supplementary file 1 [file 22dd66cfacfafdb8458739a9.docx]

Table 1

| Variables | Mean±deviation standards |
| --- | --- |
| Child's weight | 24.47±9.56 |
| Child's height | 122.12±16.93 |
| Child's head circumference | 51.29± 1.47 |
| Mother's age | 35.9± 5.12 |
| Father's age | 40.12± 4.86 |
|  |  |
| **Cancer Type** | Frequency (%) |
| AML | 8(3.8) |
| ALL | 164(77.4) |
| CML | 3(1.4) |
| Non-Hodgkin's Lymphoma | 15(7.1) |
| Neuroblastoma | 6(2.8) |
| Wilms | 6(2.8) |
| Osteosarcoma | 8(3.8) |
| Retinoblastoma | 2(0.9) |
| **Cancer Stage** |  |
| One | 18(8.7) |
| Two | 92(44.4) |
| Three | 90(43.5) |
| Four | 7(3.4) |
| **Chemotherapy** |  |
| No | 12(5.7) |
| Yes | 197(92.9) |
| **Radiotherapy** |  |
| No | 180(86.1) |
| Yes | 26(13.9) |
| **Hormone Therapy** |  |
| No | 212(100) |
| Yes | 0 |
| **Surgery** |  |
| No | 198(94.7) |
| Yes | 11(5.3) |
| **Recurrence** |  |
| No | 175(83.7) |
| Yes | 34(16.3) |

Table 1: children cancer and treatment parameters.

Table 2

| Variables |  | Children (%) | Significance limit (P value) |
| --- | --- | --- | --- |
| **Mother's education** | | | 001/0> |
| Elementary |  | 6(2.8) |
| Middle |  | 37(17.5) |
| Diploma |  | 81(38.2) |
| Associate's Degree |  | 4(1.9) |
| Bachelor's Degree |  | 72(34.0) |
| Master's Degree and Above |  | 12(5.7  ) |
| **Father's education** | | |  |
| Elementary |  | - | 001/0> |
| Middle School |  | 32 (15.1) |
| Diploma |  | 58(27.4) |
| Associate's Degree |  | 5 (2.4) |
| Bachelor's Degree |  | 97 (45.8) |
| Master's Degree and Above |  | 20 (9.4) |
| **Father's occupation** | | |  |
| Employee |  | 88(41.5) | 001/0> |
| Unemployed |  | 2(0.9) |
| Retired |  | 3(1.4) |
| Temporary |  | 15(7.1) |
| Freelance |  | 104(49.1) |
| **Mothers’ occupation** | | | |
| Employee |  | 40 (18.9) | 007/0 |
| Student |  | 6 (2.8) |
| Temporary |  | - |
| Housekeeping |  | 207 (72.6) |
| Freelance |  | 12 (5.7) |
| **Who does the child live with?** | | | |
| Parents |  | 206 (97.2) | 001/0 |
| Mother |  | 6 (2.8) |
| Others |  | - |
| Father |  | - |  |
|  | |
| Married |  | 206() | 067/0 |
| Divorced |  | 3 (1.4) |
| Widowed |  | 3 (1.4) |

Table 2: parents’ demographic parameters.

Table 3

| Variables |  |  |  |
| --- | --- | --- | --- |
| Mean ± Deviation  Standard | Correlation coefficient | P value |
| Total Sleep Disorder Score | 55.26±7.21 | 025/0 | 752/0 |
| Resistance to Bedtime | 11.52± 1.88 | 130/0- | 081/0 |
| Sleep Onset Delay | 1.97±0.75 | 208/0 | 004/0 |
| Daytime Sleepiness | 13.46± 4.33 | 110/0 | 133/0 |
| Sleep Disturbance | 7.43± 2.23 | 141/0- | 053/0 |
| Nighttime Waking | 4.81± 1.65 | 076/0 | 300/0 |
| Parasomnias | 9.65± 1.72 | 164/0- | 028/0 |
| Sleep-Disordered Breathing | 4.55± 1.62 | 128/0- | 080/0 |
| Sleep Duration | 5.84± 1.63 | 172/0 | 022/0 |
| Total Anxiety score | 74.3± 9.72 | - | 001/0> |

Table3: sleep disorders average scores and correlation to anxiety.

Table 4

|  | | | | |
| --- | --- | --- | --- | --- |
| Variables | Sleep disorders | | Anxiety | |
| Correlation coefficient | P value | Correlation coefficient | P value |
| Child's age | 312/0- | 154/0 | 453/0 | 013/0 |
| Child's weight | 108/0- | 729/0 | 213/0- | 456/0 |
| Child's height | 796/0 | 001/0> | 186/0 | 350/0 |
| Child's head circumference | 636/0- | 001/0> | 033/0 | 825/0 |
| Mother's age | 119/0- | 512/0 | 259/0- | 075/0 |
| Father's age | 416/0- | 052/0 | 108/0 | 525/0 |
| Mother's education | 085/0- | 530/0- | 260/0- | 057/0 |
| Father's education | 190/0- | 188/0 | 400/0- | 004/0 |
| Father's occupation | 216/0- | 171/0 | 148/0- | 301/0 |
| Mother's occupation | 549/0- | 001/0> | 075/0- | 565/0 |
| Who does the child live with? | 123/0 | 160/0 | 074/0 | 422/0 |
| Cancer Type | 229/0 | 018/0 | 101/0 | 273/0 |
| Stage | 050/0 | 757/0 | 152/0 | 314/0 |
| Chemotherapy | 158/0 | 038/0 | 139/0- | 044/0 |
| Radiation | 040/0- | 686/0 | 144/0 | 107/0 |
| Surgery | 058/0 | 541/0 | 025/0 | 784/0 |
| Recurrence | 126/0 | 163/0 | 428/0- | 001/0> |
|  |  |  |  |  |
|  |  |  |  |  |
|  |  |  |  |  |
|  |  |  |  |  |
|  | | | | |

Table 4: correlation sleep disorders and anxiety to children demographic, physical parameters, cancer and treatments.
